# Supplementary material for: Bipyridine-based conjugated microporous polymers for boosted photocatalytic U(vi) separation
Source: Royal Society of Chemistry journal article supplement (doi:10.1039/d4cc04456h), 2024-01-01
Supplement: d4cc04456h1.pdf [file d4cc04456h1.pdf]

## **Bipyridine-based conjugated microporous polymers for boosted photocatalytic U(VI) separation**

Yun Xie<sup>a</sup>, Zifan Li<sup>a</sup>, Chenchen Liu<sup>b</sup>, Qiming Song<sup>b</sup>, Yunhai Liu<sup>a</sup>, Zhibin Zhang<sup>\*a</sup>, and Bin Han<sup>\*b</sup>

<sup>a</sup> State Key Laboratory of Nuclear Resources and Environment, East China University of Technology, Nanchang, Jiangxi 330013, P.R. China

<sup>b</sup> Guangdong Basic Research Center of Excellence for Ecological Security and Green Development, Key Laboratory for City Cluster Environmental Safety and Green Development of the Ministry of Education, School of Ecology, Environment and Resources, Guangdong University of Technology, Guangzhou, 510006, P. R. China

**\*Corresponding Authors:** E-mail: [zhibin.zhang@ecut.edu.cn](mailto:zhibin.zhang@ecut.edu.cn) (Z. B. Zhang);  
[hanbin@gdut.edu.cn](mailto:hanbin@gdut.edu.cn) (B. Han)

## **Experimental section**

### **Text S1 Chemicals and materials**

All reagents used in the experiment are analytically pure and no further purification is required. 3,6-dibromocarbazole, 1,4-Benzenediboronic acid bis(pinacol) ester, 4,4'-Dibromobiphenyl, and 5,5'-Dibromo-2,2'-bipyridine were purchased from Jilin Chinese Academy of Sciences-Yanshen Technology Co., Ltd. Other chemicals (analytical reagent class) were provided by Adamas-beta. Ultrapure water (18 M $\Omega$ ·cm) was used in all experiments.

### **Text S2 Synthesis of 3,3',6,6'-Tetrabromo-9,9'-bicarbazole (Cz-4Br)**

The donor molecule 3,3',6,6'-Tetrabromo-9,9'-bicarbazole was synthesized following procedures outlined in prior studies<sup>1</sup>, with certain modifications. Specifically, a solution containing potassium permanganate (2.92 g) and 3,6-dibromocarbazole (2.00 g) in 40 ml of acetone was stirred for 5 hours at 333 K. The residue was extracted with CH<sub>2</sub>Cl<sub>2</sub> (150 ml). Following this, the compound was isolated via spin distillation and subsequently washed with methanol multiple times to yield a white solid (1.24 g, 62%).

### **Text S3 Synthesis of CMPs**

Cz-4Br (97.2 mg, 0.15 mmol), 1,4-Benzenediboronic acid bis(pinacol) ester (148.5 mg, 0.45 mmol), 4,4'-Dibromobiphenyl (46.8 mg, 0.15 mmol), and Pd (PPh<sub>3</sub>)<sub>4</sub> (20 mg), 20 ml N, N-Dimethylformamide (DMF) were added to a 100 ml Shrek tube, and freeze-pump-defrost three times. Then a K<sub>2</sub>CO<sub>3</sub> solution (2.0 M, 5 ml) was added to the above mixture. Reaction tubes were heated at 150 °C for 48 hours. End of the reaction, the reaction tube was cooled to room temperature and washed with methanol and dichloromethane sequentially until the effluent was clear and transparent. Put into a vacuum drying oven and dry at 50 °C for 24 hours, product Cz-Bph was obtained. The Cz-Bpy was synthesized similarly to Cz-Bph by replacing 4,4'-Dibromobipyridine with 5,5'-Dibromo-2,2'-bipyridine (47.1 mg, 0.15 mmol). The element content of Cz-Bph: C: 85.73; H: 7.14; N: 4.74. The element content of Cz-Bpy: C: 82.39; H: 6.46; N: 7.86.

#### **Text S4 Photocatalytic experiments**

The U(VI) separation experiments were conducted in a 100 mL quartz sandwich reactor cooled with circulating water at the temperature of 20 °C. Specifically, 5 mg of CMPs was mixed with 25 mL uranium solution. The pH of the uranium solution was adjusted by 0.01 mol/L NaOH/HNO<sub>3</sub>. The mixture was stirred in the dark for 60 min before being illuminated with a 300 W Xenon lamp ( $\lambda \geq 420$  nm). A 0.45  $\mu\text{m}$  membrane was used to filter the solution after a specific time. The concentration of UO<sub>2</sub><sup>2+</sup> was confirmed by using a UV-vis spectrophotometer and (Inductively Coupled Plasma Optical Emission Spectrometer) ICP-OES<sup>2-5</sup>. The removal rate of U(VI) can be calculated as  $C_t/C_0$ , that  $C_0$  and  $C_t$  are the initial concentrations of U(VI) and the concentrations at a time (t). All tests were taken three times and averaged. The error bars in the figures represent the standard deviations from triplicate tests.

#### **Text S5 Characterization methods**

The crystalline phase, morphology, and chemical state of elements of samples were characterized by X-ray diffraction (XRD, Bruker D8 Advance), scanning electron microscopy (SEM, FEI Nova Nano SEM 450), Fourier-transform infrared (FT-IR, Bruker Tensor II) spectra, and X-ray photoelectron spectroscopy (XPS, AXIS Supra+). Shimadzu UV-3101PC spectrophotometer was used to obtain ultraviolet-visible (UV-visible) absorption spectra. All of the electrochemical experiments were tested in 0.2 M sodium sulfate solution (pH=7.0) through a three-electrode electrochemical workstation (Parstat 4000A, Ametek). The working electrode consists of an ITO glass plate coated with a photocatalyst slurry. Specifically, 1 mg of catalyst, 1 mL of ethanol, and 20  $\mu\text{L}$  of Nafion D-520 were combined and subjected to 30 minutes of ultrasound treatment. Subsequently, 200  $\mu\text{L}$  of the slurry was evenly deposited onto the  $1 \times 1$  cm<sup>2</sup> ITO glass plate and allowed to dry in air. The counter electrode is platinum foil, and a saturated Ag/AgCl electrode serves as the reference electrode. The temperature-dependent photoluminescence spectra (TD-PL) were explored on the Shimadzu RF-6000 spectrometer with the assistance of a liquid nitrogen thermostat (LNT,

JouleYacht, China). The elemental contents of the as-prepared photocatalysts were verified using an elemental analyzer (Elementar Vario Micro Cube).

#### **Text S6 Computational details**

The structure of CMPs and adsorption structures of [U(VI)O<sub>2</sub>(H<sub>2</sub>O)<sub>2</sub>]@Cz-Bpy were optimized at the PBE0/DEF2-SVP+SDD level using the Gaussian 16 software. For all the calculations, the dispersion force contributed to energy is considered using the Grimme D3<sup>6</sup> method, and the solvent effect was described by the conductor-like polarizable continuum model (C-PCM).<sup>7</sup> The electron/hole distributions and Sr/Sm index were obtained with Multiwfn and Vesta<sup>8,9</sup>.

#### **Text S7 Comparison of photocatalytic activity**

We employed the following equation to assess the photocatalytic performance<sup>10,11</sup>.

$$R = \frac{1000XCV}{238MT}$$

where R is the kinetic photoreaction rate, μmol/(g·h); X is the removal efficiency caused by irradiation (X=0~100%); C is the concentration of U(VI), mg/L; V is the volume of solution, mL; M is the mass of photocatalysts, mg; and the T is the irradiation time, h. The 1000 is a constant and the 238 is the molecular weight of uranium.

#### **Text S8 Stability and reusability.**

After each photocatalytic reaction, the used materials were isolated from the solution through filtration. Subsequently, the filter membrane was immersed in a 50 mL 0.2 mol L<sup>-1</sup> Na<sub>2</sub>CO<sub>3</sub> solution, subjected to sonication for 5 minutes to disperse the solid material in the solution, and then stirred for 6 hours. Following this, the photocatalyst was separated from the uranium solution by filtration, washed, and dried for subsequent reuse. The filtrate was recycled for subsequent elution cycles, enabling the concentration of uranyl carbonate solution to increase progressively, thereby achieving the recovery and enrichment of uranyl ions.

#### **Text S9 H<sub>2</sub>O<sub>2</sub> production test and detection of H<sub>2</sub>O<sub>2</sub>.**

The photochemical synthesis of H<sub>2</sub>O<sub>2</sub> was performed in a 50 mL glass tube, which included 5 mg of photocatalyst and 25 mL of deionized water, maintained at a temperature of 25 °C under atmospheric conditions. The suspension was then subjected

to ultrasonication for approximately 3 minutes to ensure even dispersion of the photocatalyst. Next, the suspension was oxygenated for 20 minutes. Subsequently, the reaction mixture was illuminated/ultrasonicated using a 300 W xenon lamp source ( $\lambda > 420$  nm). The method of detecting  $\text{H}_2\text{O}_2$ , 0.5 mL of  $\text{C}_8\text{H}_5\text{KO}_4$  aqueous solution (0.2 M), and 0.5 mL of KI aqueous solution (0.8 M) was added into 1 mL of reaction liquid and then kept for 60 min. The concentration of  $\text{H}_2\text{O}_2$  was calculated at 350 nm and detected by a UV-vis spectrophotometer.

#### **Text S10 Coumarin experiment**

To quantify the  $\cdot\text{OH}$  radicals generated during the photoreaction, 5 mg of photocatalyst was dispersed in 25 mL of a 1 mmol/L coumarin aqueous solution. After irradiation for a specified duration, 1.0 mL of the solution was extracted. The concentration of 7-hydroxycoumarin was analyzed via photoluminescence (PL) with an excitation wavelength of 345 nm.<sup>12</sup>

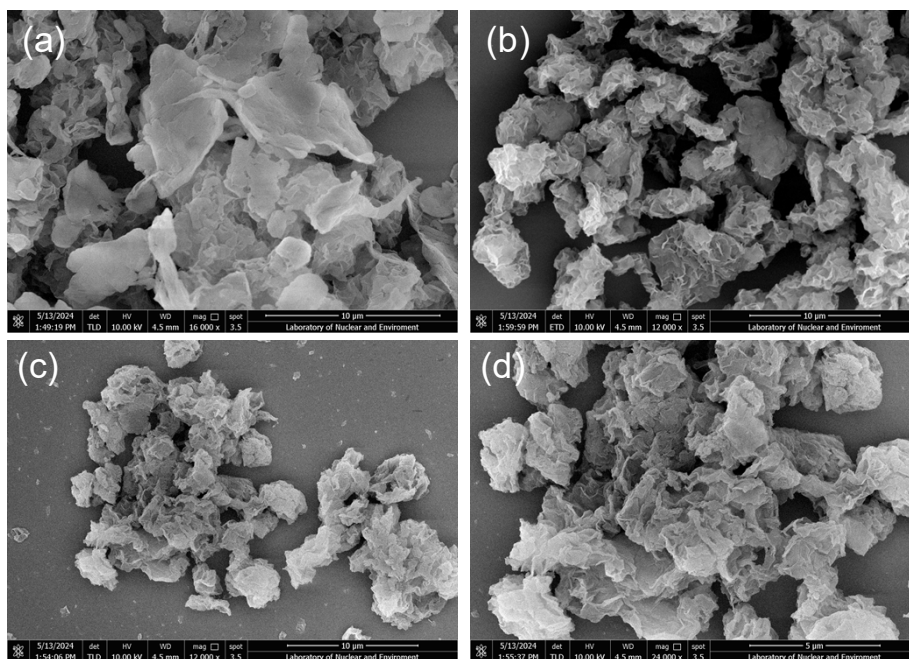

**Fig. S1.** SEM of (a,b) Cz-Bph and (c,d) Cz-Bpy.

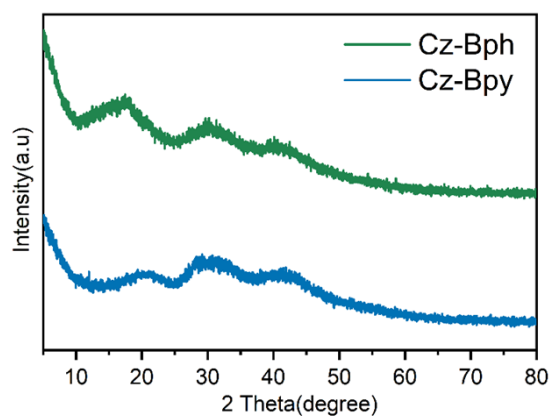

**Fig. S2.** The XRD of Cz-Bph and Cz-Bpy.

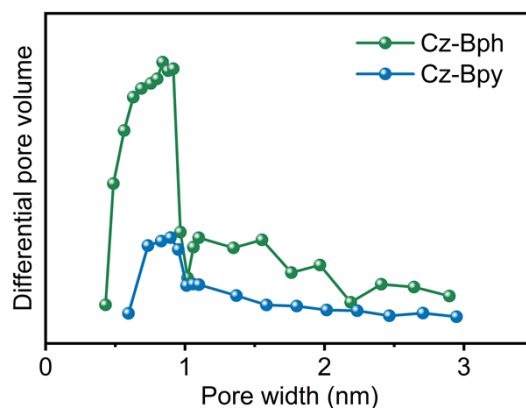

**Fig. S3.** The corresponding pore diameters of Cz-Bph and Cz-Bpy.

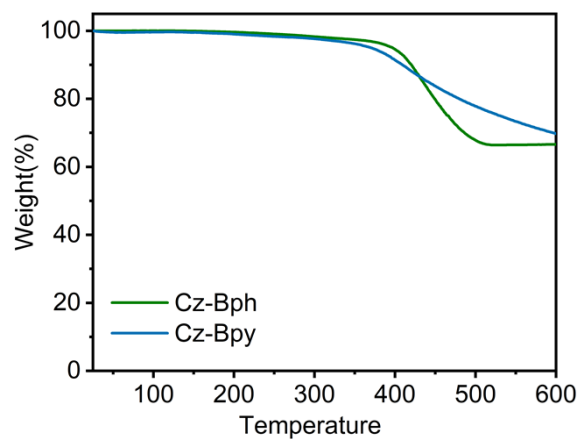

**Fig. S4.** The thermogravimetric analysis of Cz-Bph and Cz-Bpy.

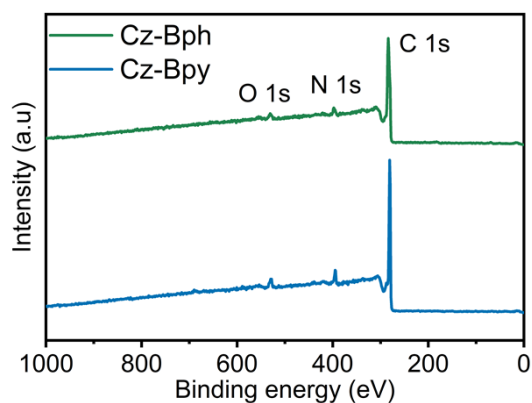

**Fig.S5.** The XRD of Cz-Bph and Cz-Bpy.

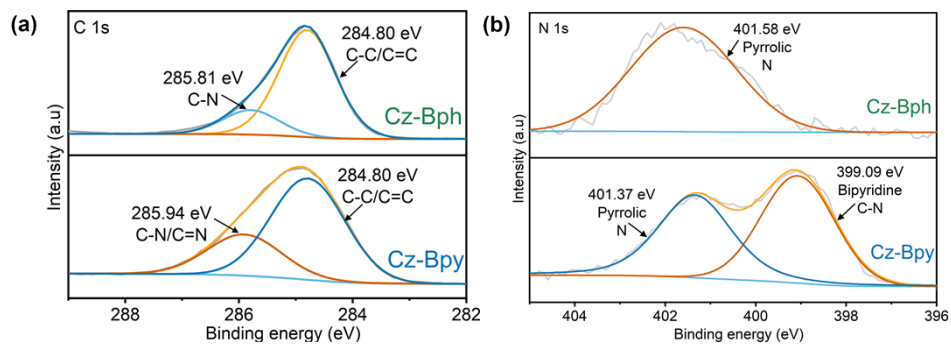

**Fig. S6.** XPS spectra of Cz-Bph and Cz-Bpy (a) C 1s spectra and (b) N 1s spectra.

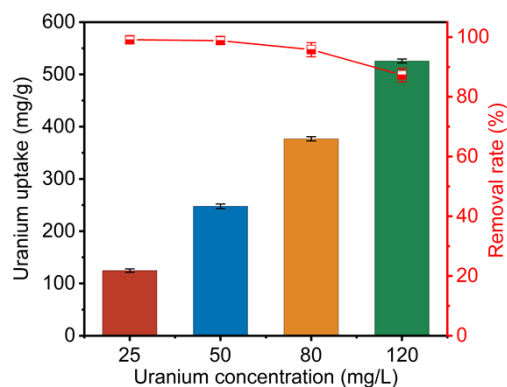

**Fig. S7** Influence of various U(VI) concentration (condition: Cz-Bpy as photocatalyst, pH = 5.0,  $m/V = 0.2$  g/L, and  $T = 293$  K). The error bars in the figure represent the standard deviations from triplicate tests.

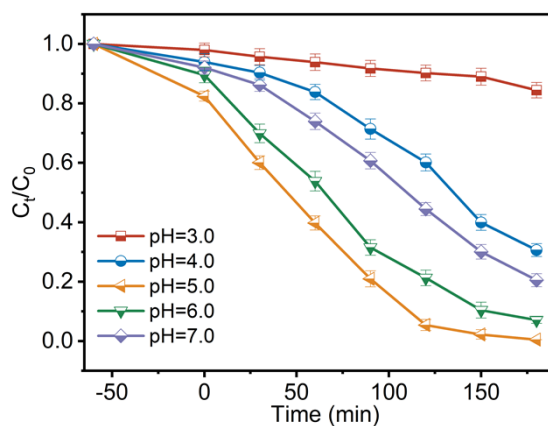

**Fig. S8** The separation of U(VI) by Cz-Bpy on various pH value ( $C_0 = 50$  mg/L,  $m/V = 0.2$  g/L, and  $T = 293$  K). The error bars in the figure represent the standard deviations from triplicate tests.

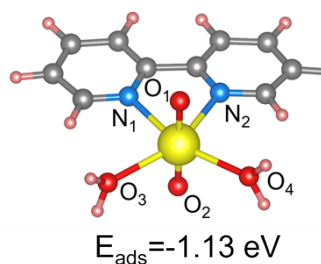

**Fig. S9.** The adsorption model and energy for the  $U(VI)O_2(H_2O)_2$  adsorbed onto Cz-Bpy.



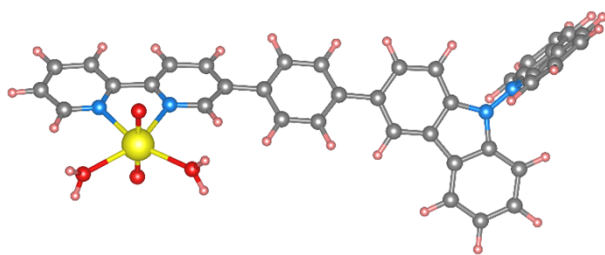

**Fig. S10.** The adsorption model of  $[\text{U}(\text{VI})\text{O}_2(\text{H}_2\text{O})_2]@\text{Cz-Bpy}$ .

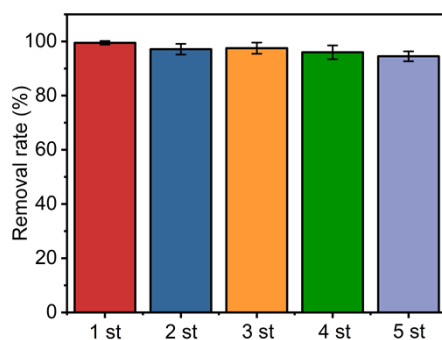

**Fig. S11.** Recycling U(VI) separation on Cz-Bpy ( $C_0 = 50 \text{ mg/L}$ ,  $m/V = 0.2 \text{ g/L}$ , and  $T = 293 \text{ K}$ ).

The error bars in the figure represent the standard deviations from triplicate tests.

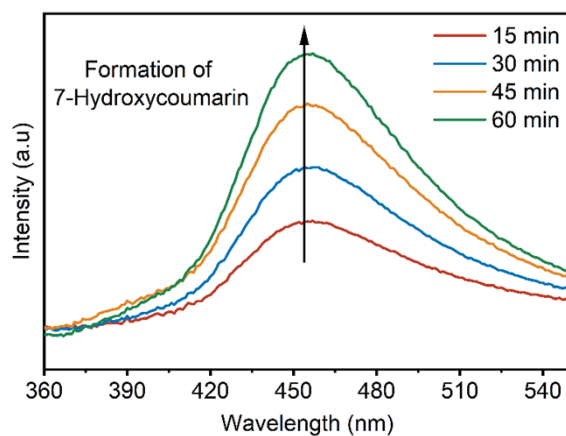

**Fig. S12.** The conversion of coumarin into 7-hydroxycoumarin by using Cz-Bpy as photocatalyst.

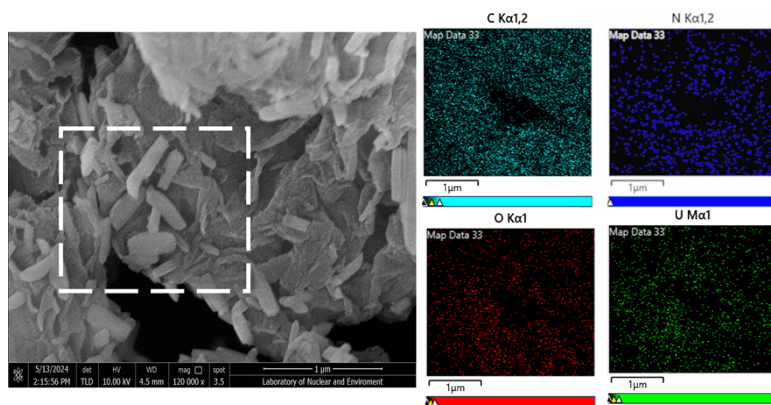

**Fig. S13** The SEM and EDS mapping images of Cz-Bpy after photoreaction.

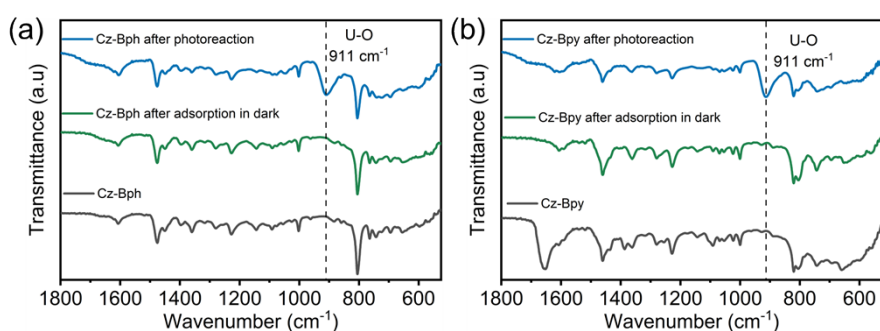

**Fig. S14.** The FT-IR spectra of Cz-Bph adsorption in the dark condition and photoreaction.

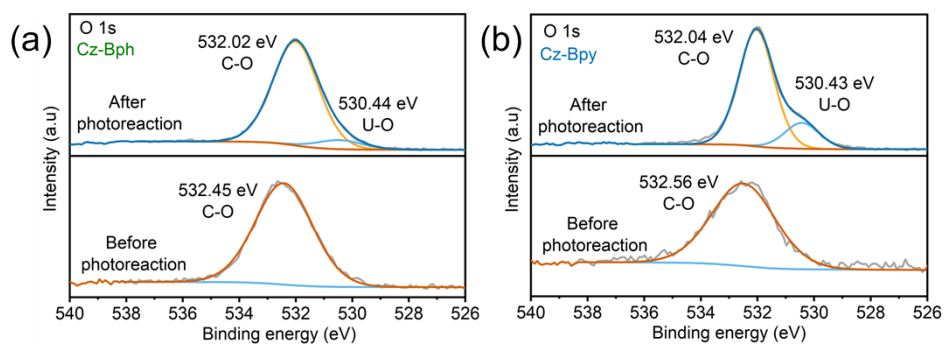

**Fig. S15.** XPS O 1s spectra of (a) Cz-Bph and (b) Cz-Bpy before and after photoreaction.

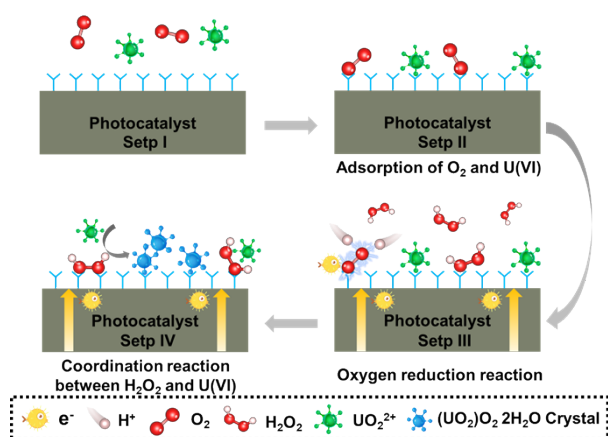

**Fig. S16.** The corresponding photocatalytic U(VI) separation mechanisms. Step I and Step II, the adsorption of O<sub>2</sub>. Step III, the O<sub>2</sub> reduction reaction (ORR) induced by photoelectrons to form H<sub>2</sub>O<sub>2</sub>. Step IV, the formation of (UO<sub>2</sub>)O<sub>2</sub>·2H<sub>2</sub>O induced by the coordination reaction between U(VI) and H<sub>2</sub>O<sub>2</sub>. The reaction formula is:

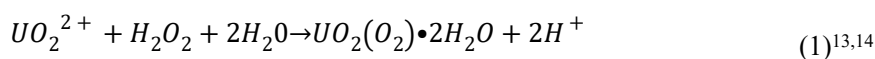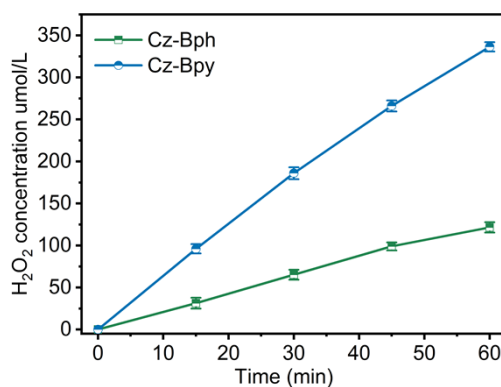

**Fig. S17.** Time course of photocatalytic H<sub>2</sub>O<sub>2</sub> production by Cz-Bph and Cz-Bpy. The error bars in the figure represent the standard deviations from triplicate tests.

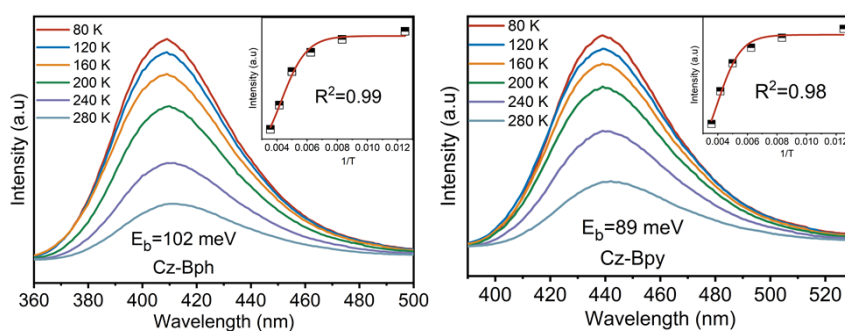

**Fig. S18.** The TD-PL spectra of Cz-Bph and Cz-Bpy.

**Table S1** Comparison of various catalysts for photocatalytic removal of U(VI).

| Catalysts                                            | C(U(VI))<br>(mg/L) | m/V<br>(g/L) | Ligh<br>sources | R<br>( $\mu\text{mol}/(\text{g}\cdot\text{h})$ ) | Ref.             |
|------------------------------------------------------|--------------------|--------------|-----------------|--------------------------------------------------|------------------|
| <b>Cz-Bpy</b>                                        | <b>50</b>          | <b>0.2</b>   | <b>Xe lamp</b>  | <b>404</b>                                       | <b>This work</b> |
| S-doped g-C <sub>3</sub> N <sub>4</sub>              | 28.6               | 0.5          | Xe lamp         | 98                                               | 10               |
| LaFeO <sub>3</sub> /g-C <sub>3</sub> N <sub>4</sub>  | 23.8               | 0.2          | Xe lamp         | 192                                              | 15               |
| g-C <sub>3</sub> N <sub>4</sub> /TiO <sub>2</sub>    | 20                 | 0.5          | Xe lamp         | 28                                               | 16               |
| MoS <sub>2</sub> /P-g-C <sub>3</sub> N <sub>4</sub>  | 50                 | 1            | Xe lamp         | 210                                              | 17               |
| CeO <sub>2-x</sub> / g-C <sub>3</sub> N <sub>4</sub> | 23.8               | 0.5          | Xe lamp         | 37                                               | 18               |
| C <sub>3</sub> N <sub>5</sub> /GO                    | 10                 | 0.5          | Xe lamp         | 78                                               | 19               |
| CN550                                                | 200                | 1            | Xe lamp         | 97                                               | 20               |
| CNNS@CdS                                             | 50                 | 1            | Xe lamp         | 96                                               | 21               |
| UiO-66-NH <sub>2</sub>                               | 110                | 0.2          | Xe lamp         | 64                                               | 22               |
| Gd/CdS-PW <sub>12</sub> AO                           | 50                 | 4            | Xe lamp         | 52                                               | 23               |
| graphene aerogel                                     | 95.2               | 0.4          | Xe lamp         | 291                                              | 24               |
| Br-C <sub>3</sub> N <sub>4</sub>                     | 40                 | 0.2          | Xe lamp         | 504                                              | 25               |
| g-C <sub>3</sub> N <sub>4</sub> /GO                  | 60                 | 0.1          | Xe lamp         | 569                                              | 26               |

**Table S2.** The species and contents of mine wastewater were given by Uranium Industry Co., Ltd in China.

| U<br>(mg/L) | CO <sub>3</sub> <sup>2-</sup><br>(g/L) | Ca <sup>2+</sup><br>(mg/L) | Mg <sup>2+</sup><br>(mg/L) | SO <sub>4</sub> <sup>2-</sup><br>(mg/L) | Cl <sup>-</sup><br>(g/L) |
|-------------|----------------------------------------|----------------------------|----------------------------|-----------------------------------------|--------------------------|
| 61.44       | 1.13                                   | 201                        | 152                        | 1870                                    | 13.16                    |

**References**

- 1 Y. Yang, L. Li, R.-B. Lin, Y. Ye, Z. Yao, L. Yang, F. Xiang, S. Chen, Z. Zhang, S. Xiang and B. Chen, *Nat. Chem.*, 2021, **13**, 933–939.
- 2 R. Cheng, R. He, R. Li and W. Zhu, *J. Radioanal. Nucl. Chem.*, 2024, **333**, 1831–1840.
- 3 F. Aydin, E. Yilmaz, E. Ölmez and M. Soylak, *Talanta*, 2020, **207**, 120295.

- 4 N. Jalbani and M. Soylak, *J. Radioanal. Nucl. Chem.*, 2014, **301**, 263–268.
- 5 F. Shah, M. Soylak, T. G. Kazi and H. I. Afridi, *J. Radioanal. Nucl. Chem.*, 2013, **296**, 1239–1245.
- 6 S. Grimme, J. Antony, S. Ehrlich and H. Krieg, *J. Chem. Phys.*, 2010, **132**, 154104.
- 7 V. Barone and M. Cossi, *J. Phys. Chem. A*, 1998, **102**, 1995–2001.
- 8 T. Lu and F. Chen, *J. Comput. Chem.*, 2012, **33**, 580–592.
- 9 Z. Liu, T. Lu and Q. Chen, *Carbon*, 2020, **165**, 461–467.
- 10 P. Liang, L. Yuan, K. Du, L. Wang, Z. Li, H. Deng, X. Wang, S.-Z. Luo and W. Shi, *Chem. Eng. J.*, 2021, **420**, 129831.
- 11 Z. Li, Z. Zhang, Z. Dong, F. Yu, M. Ma, Y. Wang, Y. Wang, Y. Liu, J. Liu, X. Cao and Y. Liu, *Sep. Purif. Technol.*, 2022, **283**, 120195.
- 12 J. Chang, Q. Li, J. Shi, M. Zhang, L. Zhang, S. Li, Y. Chen, S. Li and Y. Lan, *Angew. Chem. Int. Ed.*, 2023, **62**, e202218868.
- 13 Y. Hu, D. Tang, Z. Shen, L. Yao, G. Zhao and X. Wang, *Appl. Catal. B*, 2023, **322**, 122092.
- 14 Z. Li, Z. Zhang, X. Zhu, C. Meng, Z. Dong, S. Xiao, Y. Wang, Y. Wang, X. Cao and Y. Liu, *Appl. Catal. B*, 2023, **332**, 122751.
- 15 X. Li, J. Wang, F. Xue, Y. Wu, H. Xu, T. Yi and Q. Li, *Angew. Chem. Int. Ed.*, 2021, **60**, 2534–2540.
- 16 X.-H. Jiang, Q.-J. Xing, X.-B. Luo, F. Li, J.-P. Zou, S.-S. Liu, X. Li and X.-K. Wang, *Appl. Catal. B*, 2018, **228**, 29–38.
- 17 Z. Li, Z. Zhang, Z. Dong, Y. Wu, J. Liu, Z. Cheng, Y. Liu, Y. Wang, Z. Zheng, X. Cao, Y. Wang and Y. Liu, *J. Solid State Chem.*, 2021, **302**, 122305.
- 18 S. Li, D. Pan, Z. Cui, Y. Xu, H. Shang, W. Hua, F. Wu and W. Wu, *Sep. Purif. Technol.*, 2022, **301**, 121966.
- 19 Q. Meng, X. Yang, L. Wu, T. Chen, Y. Li, R. He, W. Zhu, L. Zhu and T. Duan, *J. Hazard. Mater.*, 2022, **422**, 126912.
- 20 S. Liu, Z. Wang, Y. Lu, H. Li, X. Chen, G. Wei, T. Wu, D.-J. Maguire, G. Ye and J. Chen, *Appl. Catal. B*, 2021, **282**, 119523.
- 21 F. Wang, Y. Liao, T. Li and L. Xia, *Sep. Purif. Technol.*, 2022, **299**, 121707.
- 22 N. Zhao, K. Zhang, Y. Lu, S. Liu, Z. Wang and X. Wang, *J. Water Process. Eng.*, 2024, **67**, 106210.
- 23 Y. Liu, D. Cui, T. Zhang, X. Yang, C. Wang and F. Li, *Chem. Eng. J.*, 2024, **497**, 154416.
- 24 Z. Wang, H. Liu, Z. Lei, L. Huang, T. Wu, S. Liu, G. Ye, Y. Lu and X. Wang, *Chem. Eng. J.*, 2020, **402**, 126256.
- 25 J. Xue, B. Wang, Z. Li, Z. Xie and Z. Le, *Res. Chem. Intermed.*, 2022, **48**, 49–65.
- 26 T. Chen, J. Zhang, H. Ge, M. Li, Y. Li, B. Liu, T. Duan, R. He and W. Zhu, *J. Hazard. Mater.*, 2020, **384**, 121383.
